# Supplementary material for: Ultraviolet-C persistent luminescence from the Lu2SiO5:Pr3+ persistent phosphor for solar-blind optical tagging
Source: Royal Society of Chemistry journal article supplement (doi:10.1039/d1dt00791b), 2021-01-01
Supplement: d1dt00791b1.pdf [file d1dt00791b1.pdf]

## Supporting Information

### **Ultraviolet-C persistent luminescence from $\text{Lu}_2\text{SiO}_5\text{:Pr}^{3+}$ persistent phosphor for solar-blind optical tagging**

Shao Yan,<sup>a</sup> Yanjie Liang,<sup>\*a,c</sup> Yafei Chen,<sup>b</sup> Jingwei Liu,<sup>a</sup> Dongxun Chen,<sup>a</sup> and Zhengwei Pan<sup>\*b</sup>

<sup>a</sup>Key Laboratory for Liquid-Solid Structure Evolution and Processing of Materials, Ministry of Education, Shandong University, Jinan 250061, China

<sup>b</sup>Center for Integrative Petroleum Research, College of Petroleum Engineering and Geosciences, King Fahd University of Petroleum and Minerals, Dhahran 31261, Kingdom of Saudi Arabia

<sup>c</sup>Advanced Medical Research Institute, Shandong University, Jinan 250012, China

\*Correspondence: Y Liang, Z Pan

E-mail: [yanjie.liang@sdu.edu.cn](mailto:yanjie.liang@sdu.edu.cn); [zhengwei.pan@gmail.com](mailto:zhengwei.pan@gmail.com)

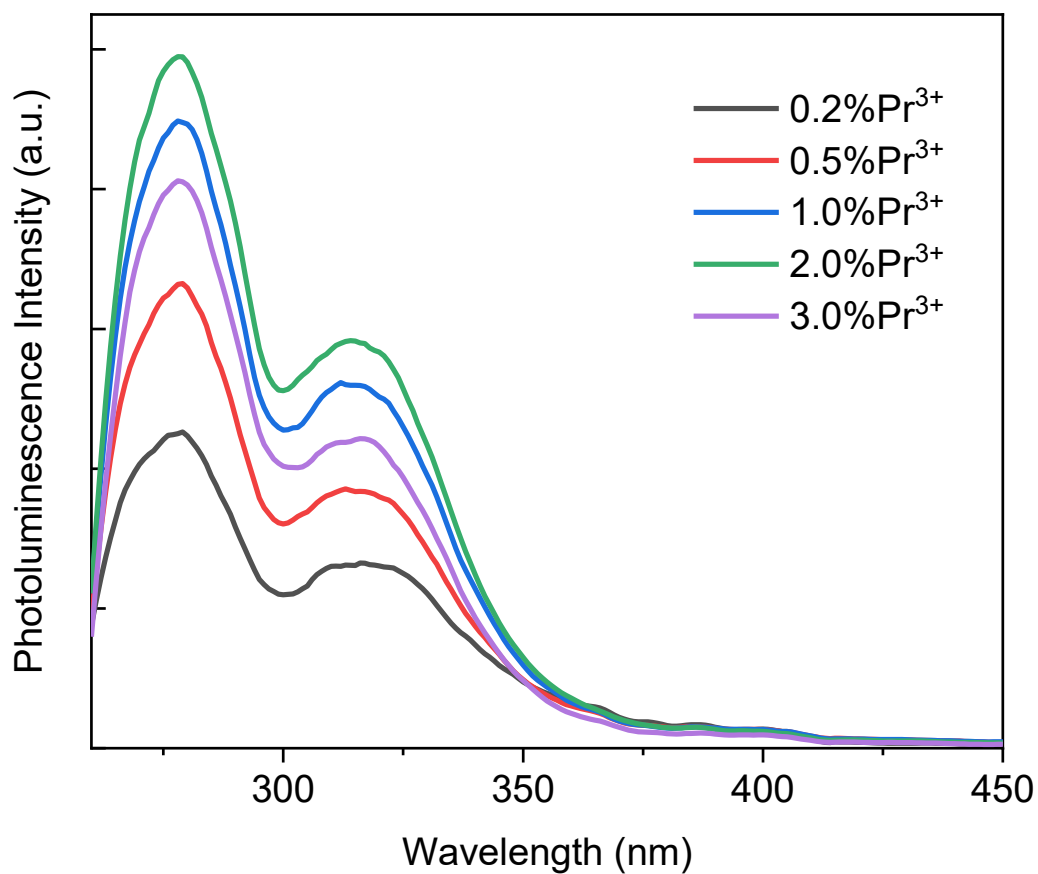

**Fig. S1.** Photoluminescence emission spectra of Lu<sub>2-x</sub>SiO<sub>5</sub>:x%Pr<sup>3+</sup> ( $x = 0.2, 0.5, 1, 2, 3$ ). The spectra are obtained under 248 nm light excitation.

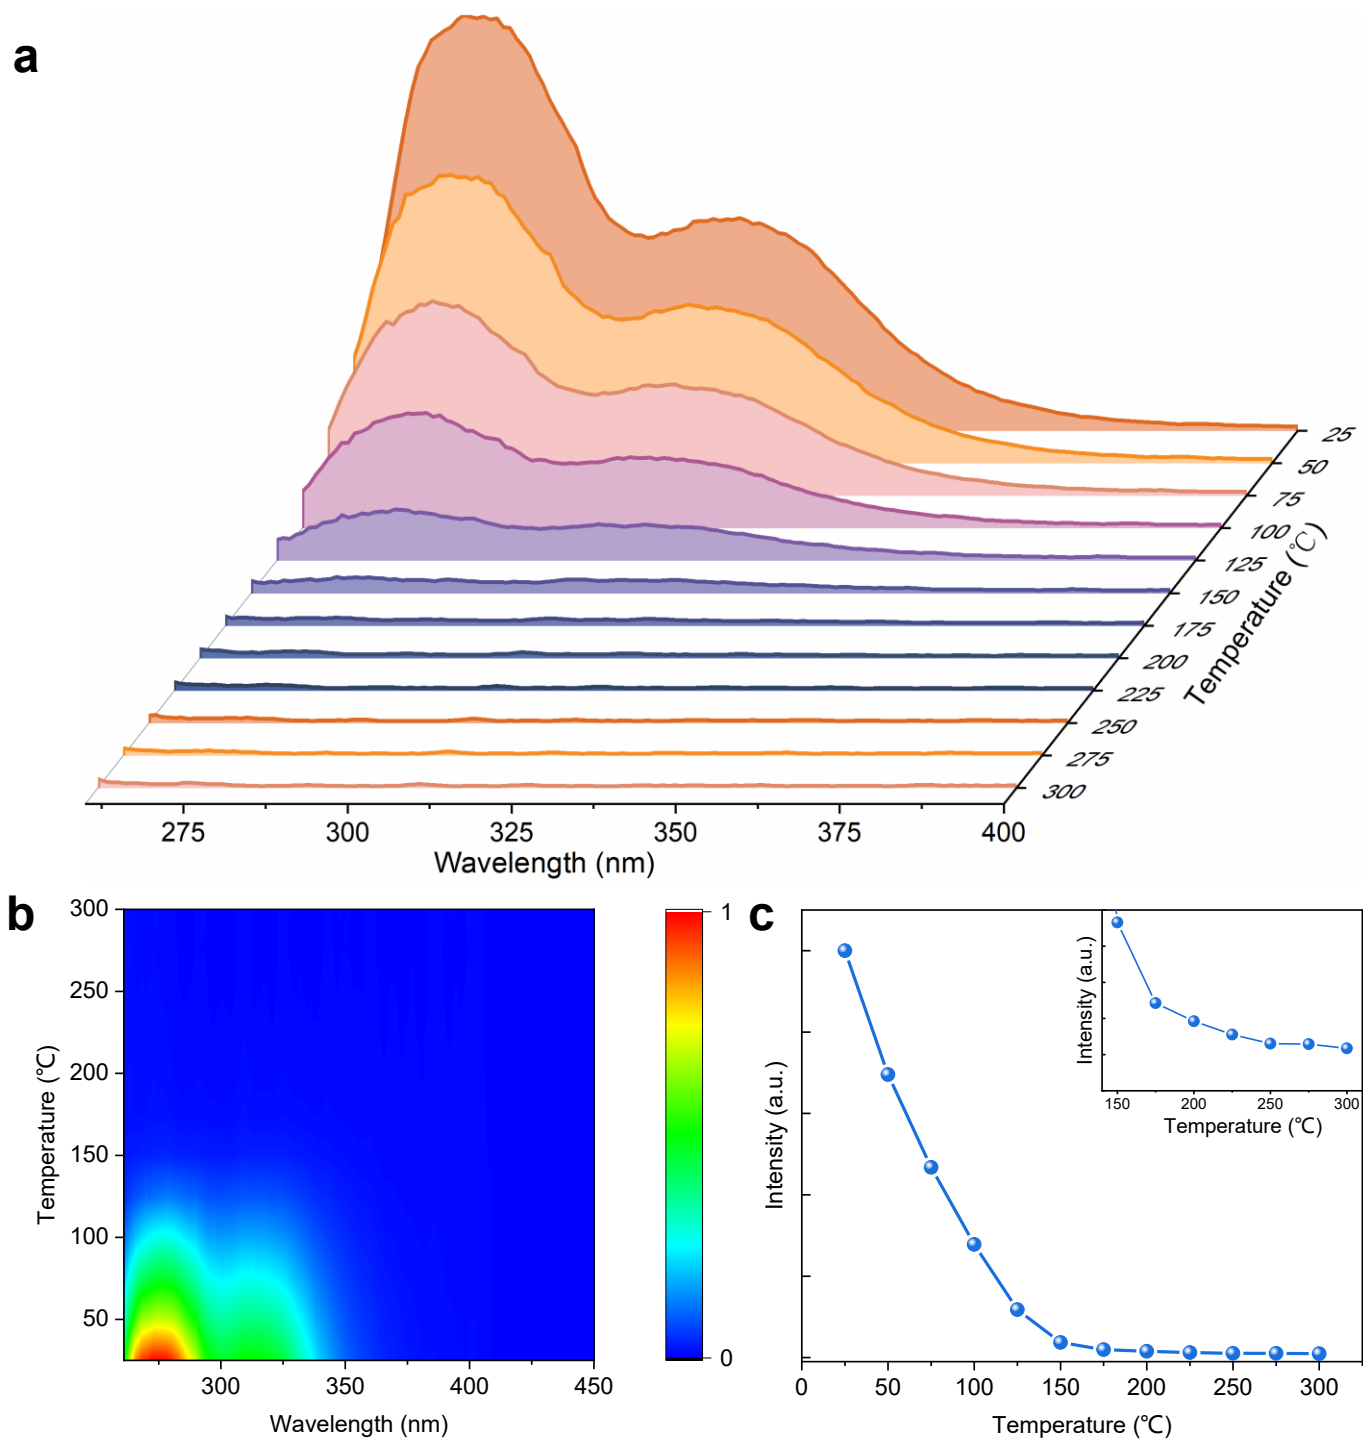

**Fig. S2.** (a) Temperature-depended emission spectra of  $\text{Lu}_2\text{SiO}_5:\text{Pr}^{3+}$ . (b) 2D color maps of temperature-dependent emission spectra of  $\text{Lu}_2\text{SiO}_5:\text{Pr}^{3+}$  phosphors. (c) Normalized emission intensities monitored at 280 nm as a function of temperature.

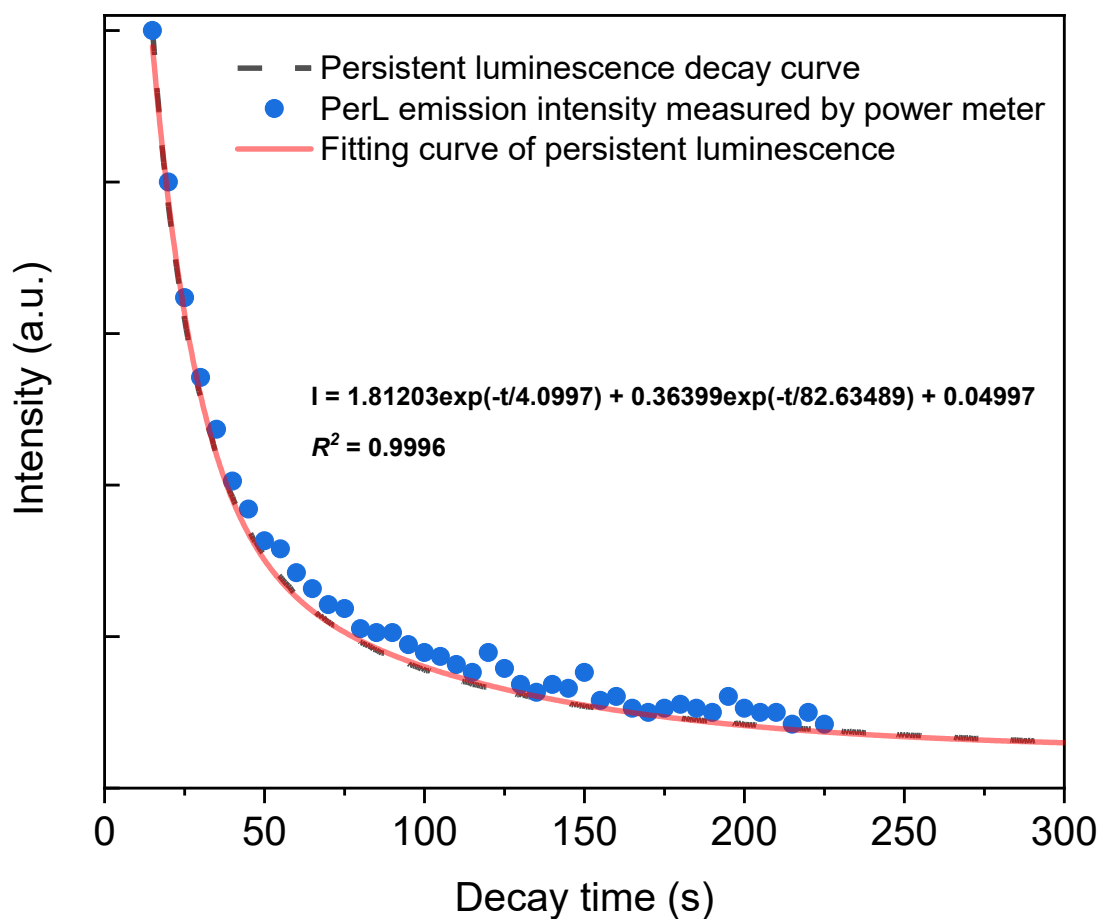

**Fig. S3.** Persistent luminescence decay curve (grey dash curve) monitored at 270 nm. The decay curve was normalized at the 15 s decay instant. The measured persistent luminescence intensity was also normalized at the 15 s decay instant and the red line is the fitting curve of persistent luminescence intensity.

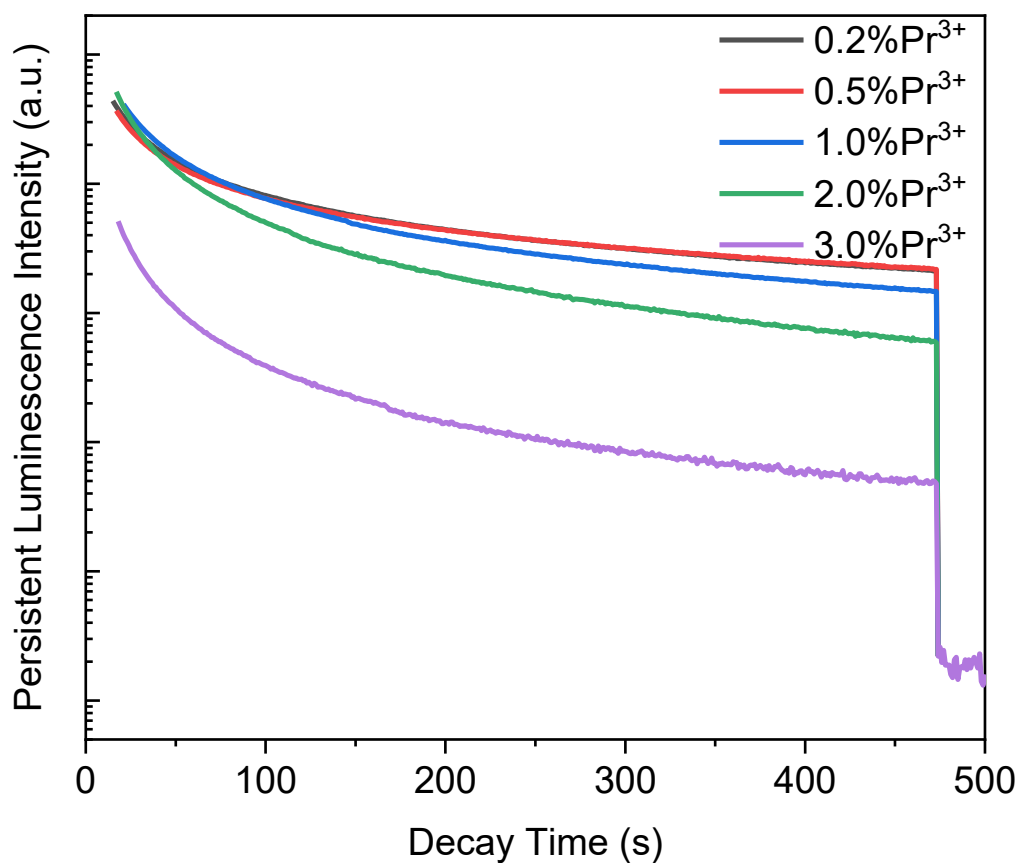

**Fig. S4.** Persistent luminescence decay curves of  $\text{Lu}_{2-x}\text{SiO}_5:x\%\text{Pr}^{3+}$  ( $x=0.2, 0.5, 1, 2, 3$ ) phosphors monitored at 270 nm at room temperature. The samples were irradiated by a 254 nm UV-lamp for 10 min.

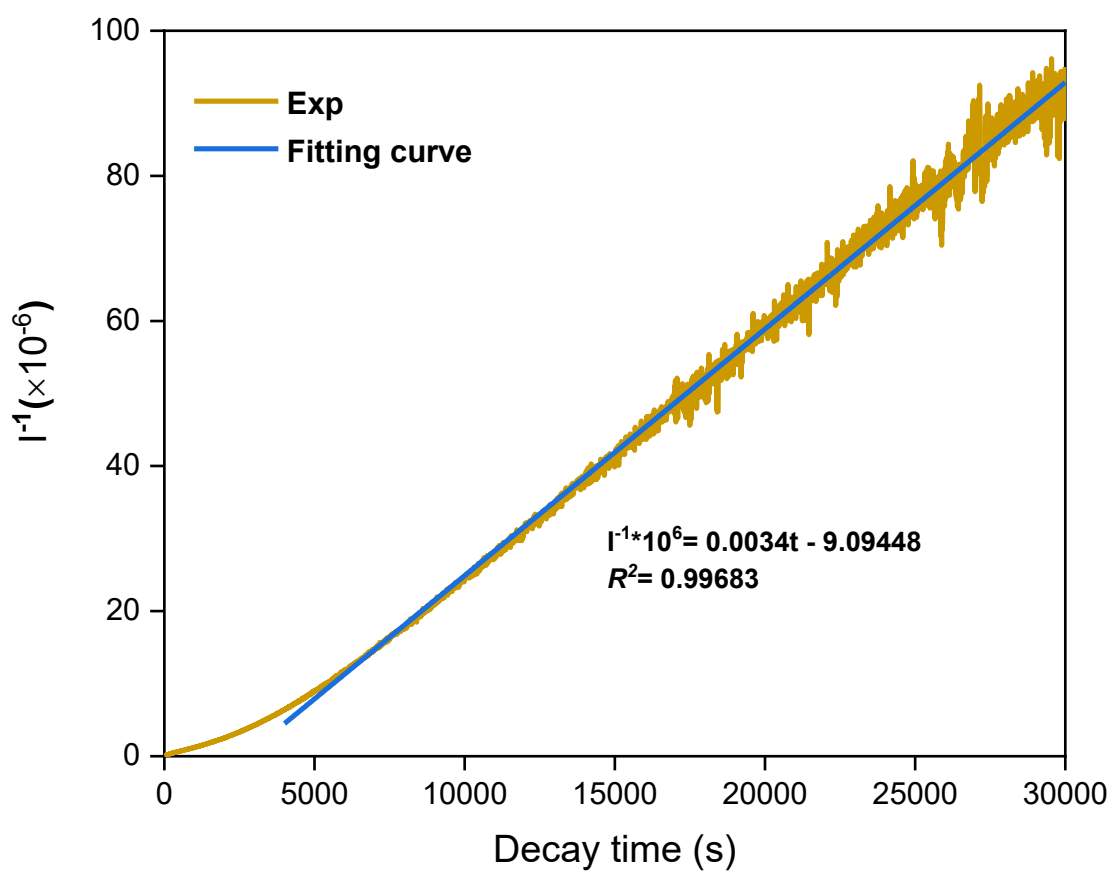

**Fig. S5.** The relationship of persistent luminescence intensity ( $I^1$ ) as a function of decay time ( $t$ ).

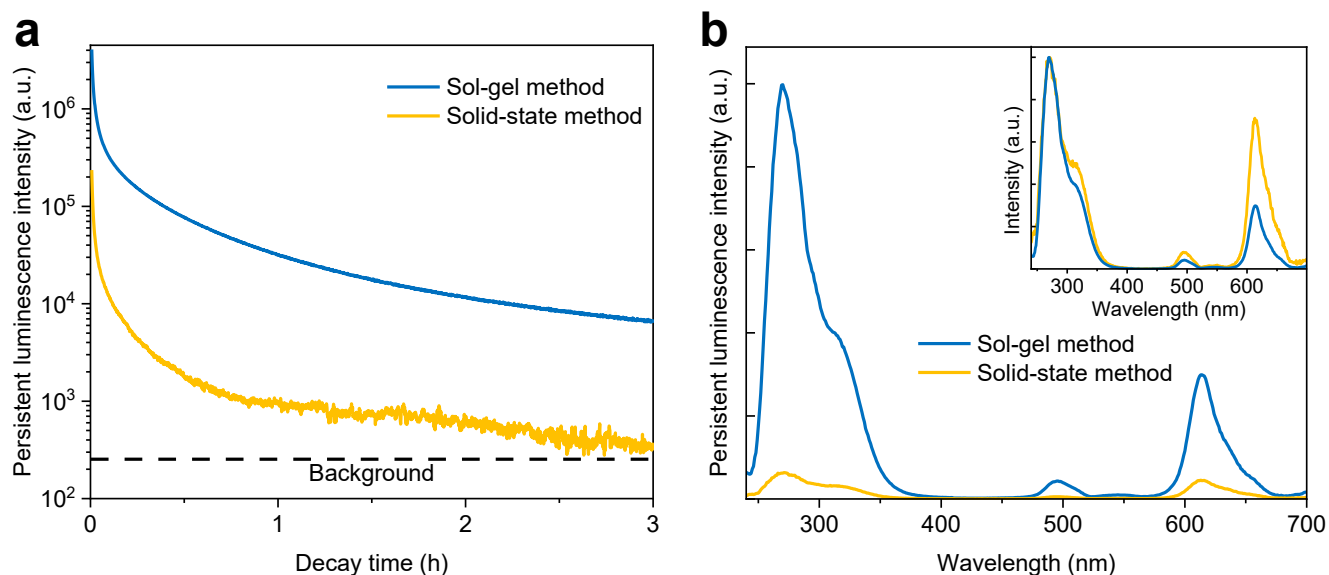

**Fig. S6.** Comparison of persistent luminescence properties of  $\text{Lu}_2\text{SiO}_5:\text{Pr}^{3+}$  prepared by sol-gel method and high-temperature solid-state reaction method. (a) Persistent luminescence decay curves of  $\text{Lu}_2\text{SiO}_5:\text{Pr}^{3+}$  prepared with different methods. The curves were monitored at 270 nm after the sample pre-irradiated by a 254 nm UV lamp for 15 min. (b) Persistent luminescence emission spectra of  $\text{Lu}_2\text{SiO}_5:\text{Pr}^{3+}$  prepared with different methods. The emission spectra were measured after 1 min decay after the stoppage of 254 nm UV lamp irradiation for 5 min. The inset shows the normalized persistent luminescence emission spectra of  $\text{Lu}_2\text{SiO}_5:\text{Pr}^{3+}$  prepared with different methods.

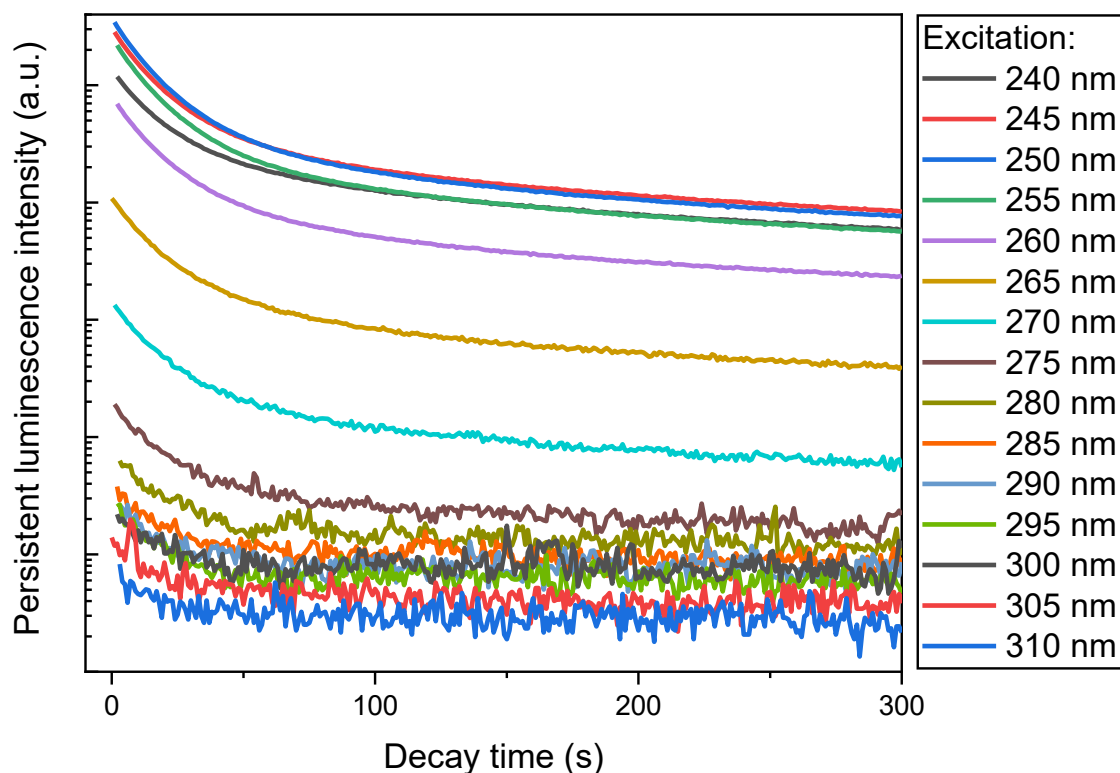

**Fig. S7.** Room temperature persistent luminescence decay curves of  $\text{Lu}_2\text{SiO}_5:\text{Pr}^{3+}$  phosphor irradiated by monochromatic light between 240-310 nm for 5 min. The monitoring wavelength is 270 nm. The persistent luminescence intensity at 30 s decay after the stoppage of the irradiation ( $I_{30s}$ ) was used to plot the persistent luminescence intensity as a function of excitation wavelength, as shown in Fig. 4b.



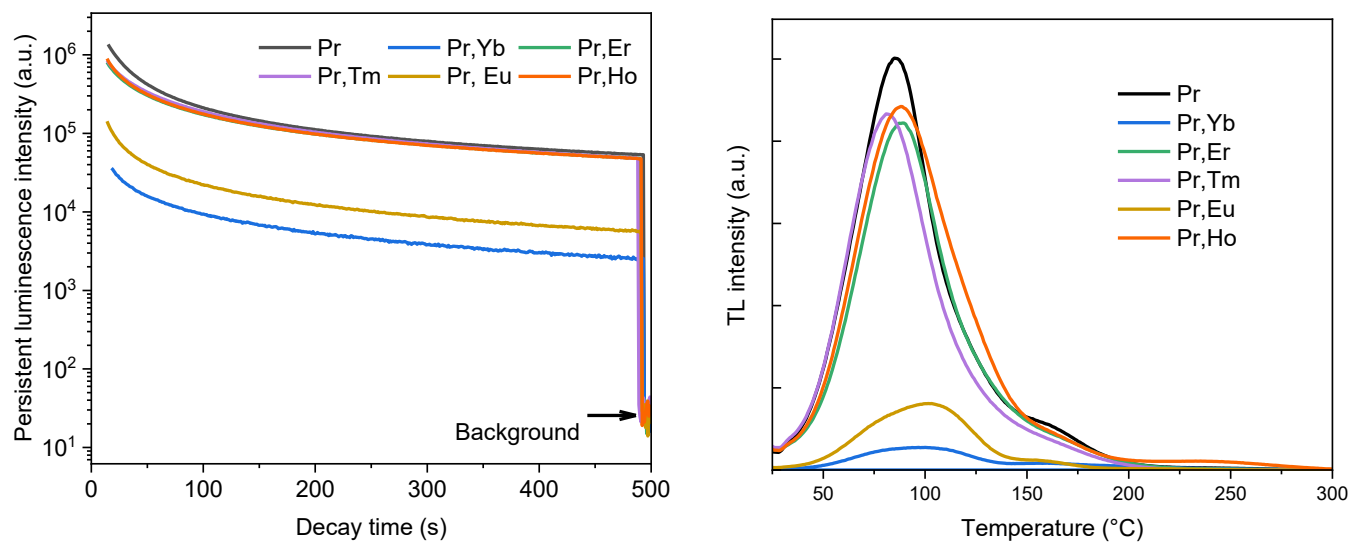

**Fig. S8.** (a) Persistent luminescence decay curves of  $\text{Lu}_2\text{SiO}_5:\text{Pr}^{3+}$  and  $\text{Lu}_2\text{SiO}_5:\text{Pr}^{3+},\text{RE}^{3+}$  (RE=Yb, Er, Tm, Eu, and Ho) samples. (b) TL curves of  $\text{Lu}_2\text{SiO}_5:\text{Pr}^{3+}$  and  $\text{Lu}_2\text{SiO}_5:\text{Pr}^{3+},\text{RE}^{3+}$  (RE=Yb, Er, Tm, Eu, and Ho) samples. The curves were measured at 1 min after the stoppage of 254 nm UV lamp irradiation.

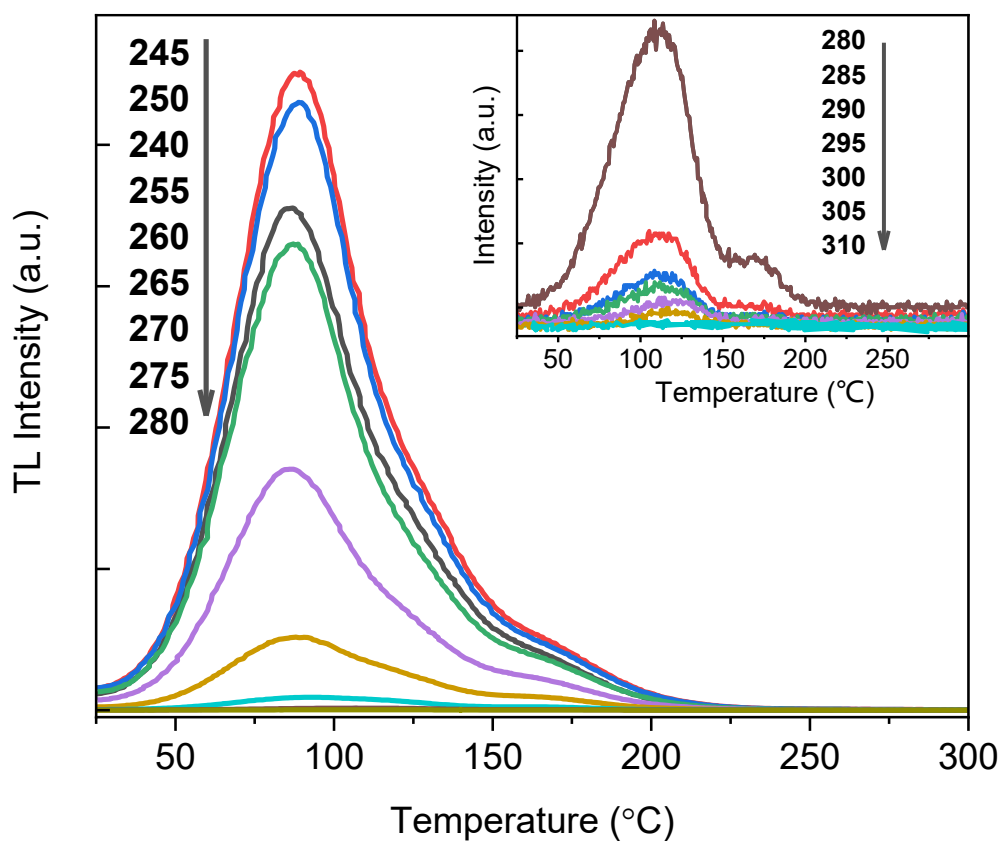

**Fig. S9.** TL curves with an excitation wavelength from 240 to 310 nm of  $\text{Lu}_2\text{SiO}_5:\text{Pr}^{3+}$  phosphor. The sample was pre-irradiated for 10 min at each measured wavelength using a xenon arc lamp.

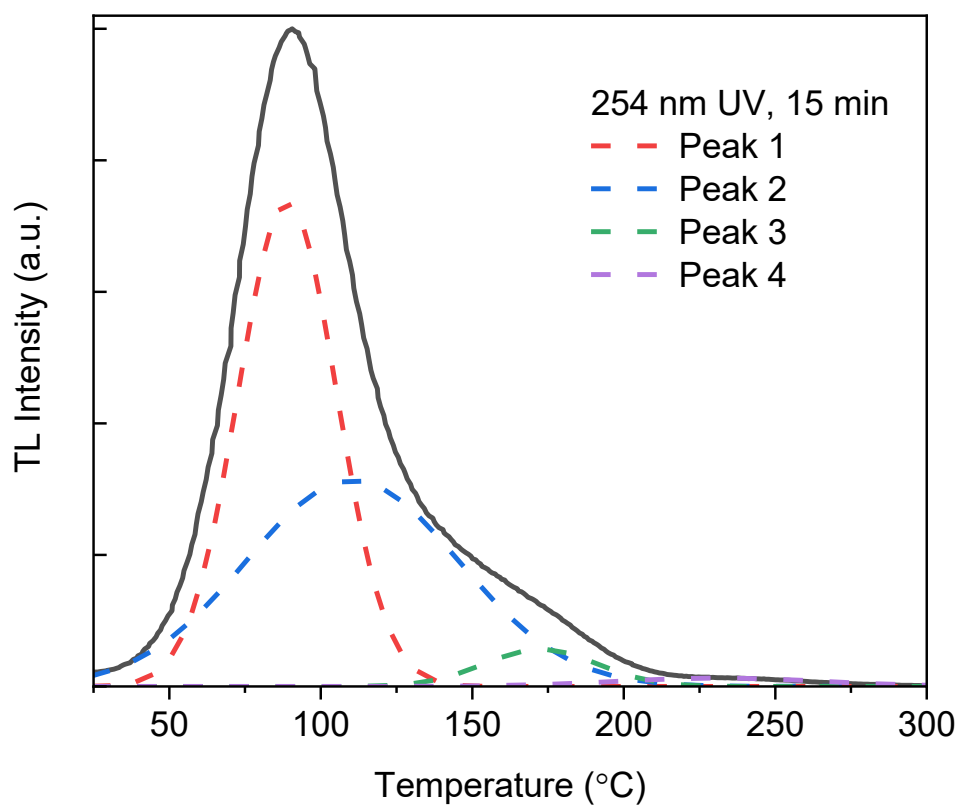

**Fig. S10.** TL curve of  $\text{Lu}_2\text{SiO}_5:\text{Pr}^{3+}$  phosphor at 60 s short decay and the Gaussian fitting results. The sample was pre-irradiated by a 254 nm UV lamp for 15 min.

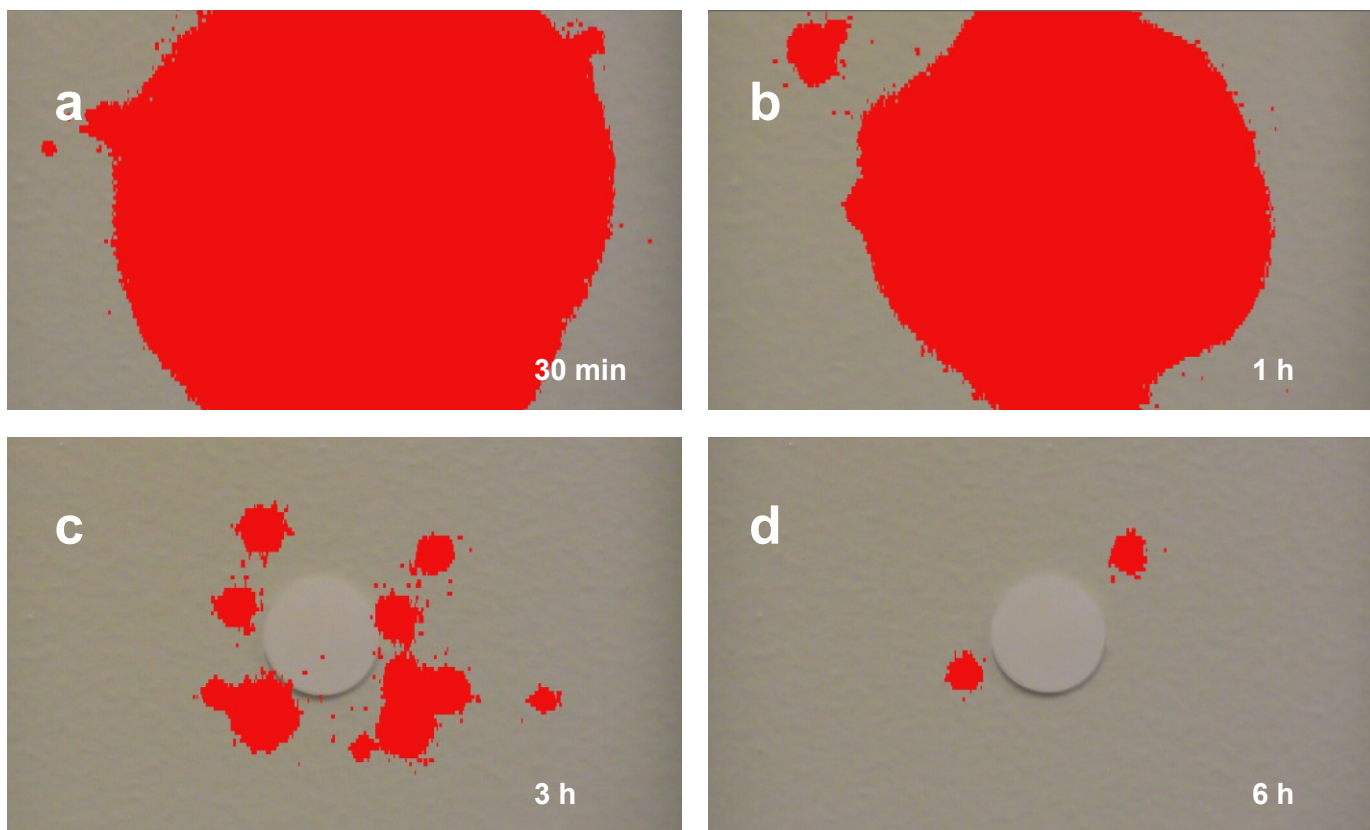

**Fig. S11.** UVC images of  $\text{Lu}_2\text{SiO}_5:\text{Pr}^{3+}$  persistent phosphor disc taken in indoor-lighting environment from 30 min to 6 h. The detected UVC emission is denoted by red pattern, whose area is proportional to the emission intensity. The sample was pre-irradiated by a 254 nm lamp for 10 min.

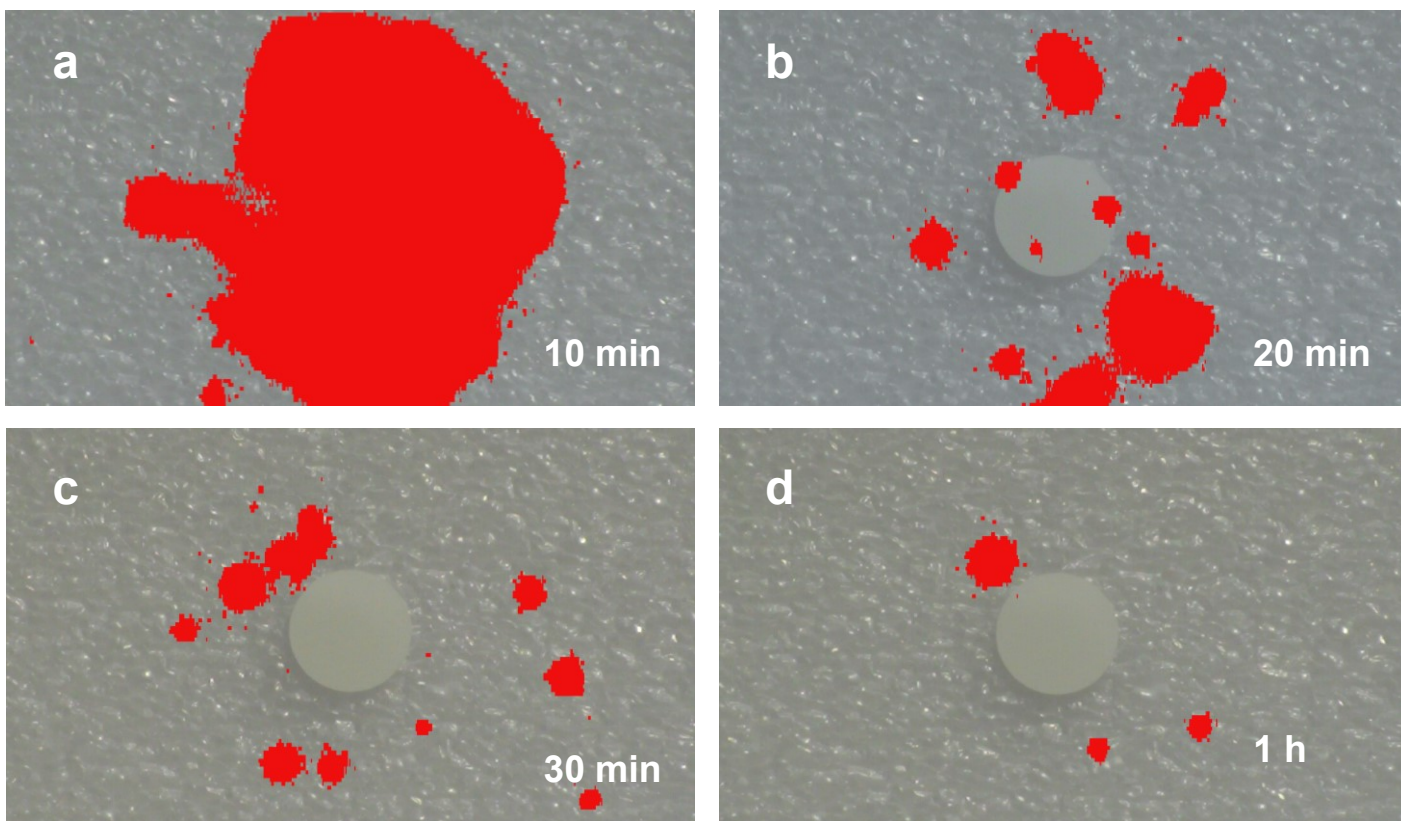

**Fig. S12.** UVC images of  $\text{Lu}_2\text{SiO}_5:\text{Pr}^{3+}$  persistent phosphor in direct sunlight from 10 min to 1 h. The detected UVC emission is denoted by red pattern, whose area is proportional to the emission intensity. The sample was pre-irradiated by a 254 nm lamp for 10 min.

| Sample                       | Lu <sub>2</sub> SiO <sub>5</sub> :0.5%Pr <sup>3+</sup> |
|------------------------------|--------------------------------------------------------|
| Space group                  | C12/c1                                                 |
| <i>a</i> (Å)                 | 14.2539(7)                                             |
| <i>b</i> (Å)                 | 6.6431(8)                                              |
| <i>c</i> (Å)                 | 10.2564(8)                                             |
| V (Å <sup>3</sup> )          | 822.113(3)                                             |
| α= γ (°)                     | 90                                                     |
| β (°)                        | 122.1681(8)                                            |
| Density (g/cm <sup>3</sup> ) | 7.1948(7)                                              |
| Rp and Rwp                   | 5.256% and 7.454%                                      |

**Table S1.** Rietveld refinement parameters of Lu<sub>2</sub>SiO<sub>5</sub>:Pr<sup>3+</sup> phosphor.

| Decay time (s) | Intensity (pW) |
|----------------|----------------|
| 5              | 304.74         |
| 10             | 180.23         |
| 15             | 130.70         |
| 20             | 104.56         |
| 25             | 84.611         |
| 30             | 70.853         |
| 35             | 61.910         |
| 40             | 54.343         |
| 45             | 48.152         |
| 50             | 42.649         |
| 55             | 41.274         |
| 60             | 37.146         |

**Table S2.** Persistent luminescence power intensities of  $\text{Lu}_2\text{SiO}_5\text{:Pr}^{3+}$  phosphor measured by a Newport UV power meter.
